# Supplementary material for: Long COVID and the mental and physical health of children and young people: national matched cohort study protocol (the CLoCk study)
Source: PubMed Central journal article supplement (PMC8392739; doi:10.1136/bmjopen-2021-052838), 2021-08-26

# BMJ Open

BMJ Open is committed to open peer review. As part of this commitment we make the peer review history of every article we publish publicly available.

When an article is published we post the peer reviewers' comments and the authors' responses online. We also post the versions of the paper that were used during peer review. These are the versions that the peer review comments apply to.

The versions of the paper that follow are the versions that were submitted during the peer review process. They are not the versions of record or the final published versions. They should not be cited or distributed as the published version of this manuscript.

BMJ Open is an open access journal and the full, final, typeset and author-corrected version of record of the manuscript is available on our site with no access controls, subscription charges or pay-per-view fees (<http://bmjopen.bmj.com>).

If you have any questions on BMJ Open's open peer review process please email [info.bmjopen@bmj.com](mailto:info.bmjopen@bmj.com)

# BMJ Open

## Long Covid and the mental and physical health of children and young people; a national matched cohort study (CLoCk).

|                               |                                                                                                                                                                                                                                                                                                                                                                                                                                                                                                                                                                                                                                                                                                                                                                                             |
|-------------------------------|---------------------------------------------------------------------------------------------------------------------------------------------------------------------------------------------------------------------------------------------------------------------------------------------------------------------------------------------------------------------------------------------------------------------------------------------------------------------------------------------------------------------------------------------------------------------------------------------------------------------------------------------------------------------------------------------------------------------------------------------------------------------------------------------|
| Journal:                      | <i>BMJ Open</i>                                                                                                                                                                                                                                                                                                                                                                                                                                                                                                                                                                                                                                                                                                                                                                             |
| Manuscript ID                 | bmjopen-2021-052838                                                                                                                                                                                                                                                                                                                                                                                                                                                                                                                                                                                                                                                                                                                                                                         |
| Article Type:                 | Protocol                                                                                                                                                                                                                                                                                                                                                                                                                                                                                                                                                                                                                                                                                                                                                                                    |
| Date Submitted by the Author: | 06-May-2021                                                                                                                                                                                                                                                                                                                                                                                                                                                                                                                                                                                                                                                                                                                                                                                 |
| Complete List of Authors:     | Stephenson, Terence; UCL Great Ormond Street Institute of Child Health Population Policy and Practice<br>Shafran, Roz; UCL Great Ormond Street Institute of Child Health Population Policy and Practice<br>De Stavola, Bianca ; UCL Great Ormond Street Institute of Child Health Population Policy and Practice<br>Rojas, Natalia; UCL Great Ormond Street Institute of Child Health Population Policy and Practice<br>Aiano, Felicity; Public Health England<br>Amin-Chowdhury, Zahin; Public Health England<br>McOwat, Kelsey; Public Health England<br>Simmons, Ruth; Public Health England<br>Zavala, Maria; Public Health England<br>CLoCk, Consortium; UCL Great Ormond Street Institute of Child Health Population Policy and Practice<br>Ladhani, Shamez N.; Public Health England |
| Keywords:                     | COVID-19, PAEDIATRICS, INFECTIOUS DISEASES, PUBLIC HEALTH, VIROLOGY                                                                                                                                                                                                                                                                                                                                                                                                                                                                                                                                                                                                                                                                                                                         |
|                               |                                                                                                                                                                                                                                                                                                                                                                                                                                                                                                                                                                                                                                                                                                                                                                                             |

SCHOLARONE™  
Manuscripts

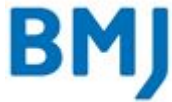

I, the Submitting Author has the right to grant and does grant on behalf of all authors of the Work (as defined in the below author licence), an exclusive licence and/or a non-exclusive licence for contributions from authors who are: i) UK Crown employees; ii) where BMJ has agreed a CC-BY licence shall apply, and/or iii) in accordance with the terms applicable for US Federal Government officers or employees acting as part of their official duties; on a worldwide, perpetual, irrevocable, royalty-free basis to BMJ Publishing Group Ltd ("BMJ") its licensees and where the relevant Journal is co-owned by BMJ to the co-owners of the Journal, to publish the Work in this journal and any other BMJ products and to exploit all rights, as set out in our [licence](#).

The Submitting Author accepts and understands that any supply made under these terms is made by BMJ to the Submitting Author unless you are acting as an employee on behalf of your employer or a postgraduate student of an affiliated institution which is paying any applicable article publishing charge ("APC") for Open Access articles. Where the Submitting Author wishes to make the Work available on an Open Access basis (and intends to pay the relevant APC), the terms of reuse of such Open Access shall be governed by a Creative Commons licence – details of these licences and which [Creative Commons](#) licence will apply to this Work are set out in our licence referred to above.

Other than as permitted in any relevant BMJ Author's Self Archiving Policies, I confirm this Work has not been accepted for publication elsewhere, is not being considered for publication elsewhere and does not duplicate material already published. I confirm all authors consent to publication of this Work and authorise the granting of this licence.

1  
2  
3 Long Covid and the mental and physical health of children and young people; a national  
4 matched cohort study (CLOcK).  
5

6  
7 Abstract 250 words. Main paper 2294 words.  
8

9 Stephenson T<sup>1</sup>, Shafran R<sup>1</sup>, De Stavola B<sup>1</sup>, Rojas N<sup>1</sup>, Aiano F<sup>2</sup>, Amin-Chowdhury Z<sup>2</sup>, McOwat  
10 K<sup>2</sup>, Simmons R<sup>2</sup>, Zavala M<sup>2</sup>, CLOcK Consortium<sup>1</sup>, Ladhani S<sup>2</sup>.  
11

12  
13 1 UCL Great Ormond Street Institute of Child Health

14 2 Public Health England, Colindale  
15

16  
17 **Corresponding author:** Professor Sir Terence Stephenson; UCL Great Ormond Street Institute  
18 of Child Health, 30 Guilford Street, London, WC1N 1EH; Email: [t.stephenson@ucl.ac.uk](mailto:t.stephenson@ucl.ac.uk);  
19 Telephone: 020 7242 9789; Fax Number: N/A  
20

21 **Five Keywords/phrases:** Long COVID, children, young people, cohort study, physical and  
22 mental health  
23  
24  
25  
26  
27  
28  
29  
30  
31  
32  
33  
34  
35  
36  
37  
38  
39  
40  
41  
42  
43  
44  
45  
46  
47  
48  
49  
50  
51  
52  
53  
54  
55  
56  
57  
58  
59  
60

## Abstract

**Introduction:** There is uncertainty surrounding the diagnosis, prevalence, phenotype, duration and treatment of Long COVID. This study aims to (a) describe the clinical phenotype of post-COVID symptomatology in CYP with laboratory-confirmed SARS-CoV-2 infection compared to test-negative controls (b) produce an operational definition of Long COVID in CYP (c) establish the prevalence of Long COVID in CYP.

**Methods and analysis:** A cohort study of SARS-CoV-2 positive CYP aged 11-17 years compared with age-, sex- and geographically-matched SARS-CoV-2 test-negative CYP. CYP aged 11-17 testing positive and negative for SARS-CoV-2 infection will be identified and contacted 3, 6, 12 and 24 months after the test date. Consenting CYP will complete an online questionnaire. We will recruit 3,000 test positives and 3,000 test negatives. Data visualisation techniques will be used to examine trajectories over time for symptoms and variables measured repeatedly, separately by original test status. Summary measures of fatigue and mental health dimensions will be generated using dimension reduction methods such as latent variables/latent class/PCA methods. Cross-tabulation of collected and derived variables against test status and discriminant analysis will help operationalise preliminary definitions of Long COVID.

**Ethics and Dissemination:** Research Ethics Committee Approval granted. Data will be stored in secure PHE servers or UCL's Data Safe Haven. Risks of harm will be minimised by providing information on where to seek support. Results will be published on a pre-print server followed by journal publication, with reuse of articles under a CC BY licence. Data will be published with protection against identification when small frequencies.

**Study registration:** Study registered with ISRCTN: Trial ID: ISRCTN34804192 and granted Urgent Public Health prioritisation.

**Data Sharing:** Applications for relevant anonymised data should be submitted to the Public Health England office for Data Release: <https://www.gov.uk/government/publications/accessing-public-health-england-data/about-the-phe-odr-and-accessing-data>

## Article Summary

### STRENGTHS

- This study does not start with an arbitrary definition of a new condition – ‘opinion based medicine’
- Rather it represents ‘evidence based medicine’ - we will seek the views of 6,000 children and young people on what they have experienced physically and mentally in the months following COVID-19
- The study incorporates a comparator matched cohort of children and young people who have experienced a pandemic, school closure and social isolation but who had a negative COVID test

### WEAKNESSES

- The comparator matched cohort of children and young people must also have had a reason to seek a COVID test: symptoms, anxiety, a contact or a bereavement
- Ideally, we would test all children for antibodies to confirm COVID-19 positive and negative status throughout the study period but we thought would significantly reduce participation

## Introduction

Currently, there is huge uncertainty surrounding the diagnosis, prevalence, phenotype, duration and treatment of Long COVID. There is currently no diagnostic test or code for Long COVID. Consequently, cases of Long COVID are not captured in routine National Health Service (NHS) administrative datasets. Instead, Long COVID may be coded as a variety of different conditions in hospital or symptom clusters in non-hospitalised CYP. However, it is possible the symptoms associated with Long COVID are in fact a mixture of factors relating to the pandemic and lockdown as a whole rather than the viral infection itself. For example, factors such as social isolation, anxiety, depression or educational concerns may be the root cause of these symptoms in CYP both with and without SARS-CoV-2 infection. The effects on the developing brain and behaviour of adolescents could be far reaching<sup>1</sup>.

Despite acute COVID-19 illness being milder in CYP, it should not be assumed that those CYP at low risk of life-threatening acute infections<sup>2,3</sup> do not suffer the longer-term consequences of SARS-CoV-2 infection. It is important to study Long COVID within this population given that the psychological and social impact of Long COVID could have major consequences for transition to adulthood. There is a clear need to define the clinical phenotype of Long COVID in order to understand those most at risk, the illness trajectory and to provide accurate information on the natural course of the condition. It is equally important to understand both the physical and mental health impact on CYP with Long COVID, given the rise in mental health problems among CYP since the start of the pandemic<sup>4</sup>. Obtaining a better understanding of which CYP are affected will help with targeting potential interventions.

The greatest risk factor for severe acute SAR-CoV-2 illness has been old age, with other risk factors at all ages including obesity, comorbid long-term conditions, learning and neurological disabilities, mental health problems and ethnic minority status. It is plausible that such CYP may be most at risk of suffering from Long COVID, given that much is still unknown in CYP about the immunological susceptibility and underlying biology of Long COVID. Of all CYP, those likely to be most at risk of Long COVID are teenagers, with existing literature showing they make up the majority of CYP with chronic fatigue, post viral syndromes and persistent symptoms<sup>5</sup>.

In adults, there is emerging evidence that gender is a risk factor for Long COVID, with middle-aged females more susceptible than men<sup>6</sup>. In terms of symptoms, two main groupings have been identified (i) respiratory symptoms (e.g. cough, shortness of breath) as well as fatigue and headaches, and (ii) multi-system, including the brain, gut and heart. Among adults with Long COVID, heart symptoms such as palpitations or fast heartbeat, pins and needles or numbness and problems concentrating ('brain fog') have been reported. Experiencing a greater number of symptoms during the first week of infection, as well as older age, have also been linked to Long COVID. It should be noted mental health conditions were not reported in this cohort. Four syndromes have been described in adults: Post-viral fatigue; Fluctuating multi-system symptoms; Post-intensive care syndrome; and Lasting organ damage. It is known in both adults and young people that a wide range of long-term physical conditions increase the risk of mental ill-health, particularly if the condition involves the central nervous system, with several studies

1  
2  
3 reporting increased rates of all common mental health conditions in children<sup>7</sup>. Moreover, fatigue  
4 has also been studied in paediatric long-term conditions including CYP with multiple sclerosis<sup>8,9</sup>.  
5 Emerging clinical observations and preliminary research indicate that COVID-19 can have a  
6 long-term impact on CYP in a range of domains<sup>10,11</sup> but well conducted, methodologically robust  
7 studies are lacking.  
8  
9

10 This study primarily aims to (a) describe the clinical phenotype and prevalence of post-COVID  
11 symptoms (e.g. pain or physical symptoms, fatigue, sleep problems, mental health problems)  
12 among test positive and test negative CYP, (b) produce an operational definition of Long COVID  
13 in CYP, and (c) establish the prevalence of Long COVID in CYP testing positive for SARS-CoV-  
14 2 infection. The second aim is of particular importance given that this is a prerequisite for any  
15 future epidemiological or interventional study. This will be achieved by using the empirical data  
16 we will acquire from 6,000 CYP and a national Delphi consensus process.  
17  
18  
19

## 20 **Methods**

### 21 *Study design and setting*

22  
23  
24  
25 Public Health England (PHE) has been conducting national surveillance of SARS-CoV-2 since  
26 the start of the pandemic in England. PHE receives daily electronic notifications of all SARS-  
27 CoV-2 RT-PCR tests performed in healthcare settings (Pillar 1 tests) and in the community  
28 (Pillar 2 tests), which are reported through the Second Generation Surveillance System (SGSS).  
29 Information within the SGSS reports includes NHS number, name, age, sex, postcode, date of  
30 sample, reporting laboratory and test result. PHE also has access to the electronic Patient  
31 Demographic Service (PDS), which contains the names, addresses and status (alive/dead) of  
32 all patients registered with the NHS.  
33  
34  
35

36 A sample of CYP aged 11-17 years old when testing positive for SARS-CoV-2 between  
37 September 2020 and March 2021 and twice as many COVID test-negative CYP matched for  
38 age, sex and region identified through SGSS will be linked to PDS using available identifiers  
39 and postal addresses. A letter will be posted to them, informing them about the study and  
40 inviting them to take part using an online link. This link will provide them with information about  
41 the study, with an option to consent online and complete a short recruitment questionnaire (or  
42 both as paper options).  
43  
44  
45

46 This will be a cohort study of SARS-CoV-2 test-positive CYP aged 11-17 years matched on the  
47 test date, age, sex and geography to SARS-CoV-2 test-negative controls identified by PHE.  
48

### 49 *Participants*

50  
51  
52 Between 1<sup>st</sup> September 2020 and 31<sup>st</sup> March 2021, 234,803 CYP aged between 11 and 17 years  
53 were tested positive for SARS-CoV-2 in England, and 1,245,288 CYP tested negative. Among  
54 those who tested negative, 80,365 were excluded as they had a positive result pre- and/or post  
55 their negative test and we wish to compare test-positive with test-negative CYP. The positive and  
56  
57  
58



1  
2  
3 negative cohorts were matched using age at test, gender, month of test, and lower super output  
4 area resulting in 102,402 positive individuals and 147,561 negative individuals. Matched  
5 individuals were checked against PDS to exclude any individuals who have died, and to extract  
6 participants addresses to send invitation letters. 33 individuals were excluded because of death  
7 since their COVID-19 test (6 among those positive and 27 among those negative), and 11,982  
8 individuals of the positive cohort and 16,635 individuals of the negative cohort were excluded as  
9 an address was not available. Finally, 246 CYP were excluded as they were included in a previous  
10 pilot study which helped inform our methodology. Following exclusions, 90,227 positive CYP and  
11 130,243 negative CYP form the population from which we will randomly sampled individuals for  
12 inclusion within the study.  
13  
14  
15

16 Participants will be contacted in a ratio of 1:2 positives:negatives on the expectation of a lower  
17 participation rate in the latter. We anticipate 20% to be recruited in the positive group, as  
18 estimated by CYP recruitment rates in other PHE studies on COVID-19 (sKIDs)<sup>12</sup>. We also  
19 oversampled CYP who had a test in the months of January-March 2021 because only for these  
20 groups we will collect information at 3 months of follow-up.  
21  
22  
23

24 This is shown schematically in Figure 1.  
25

### 26 *Data collection*

27  
28 Participating families of CYP will be contacted 3, 6, 12 and 24 months after the CYP's SARS-  
29 CoV-2 test (depending on recruitment month) and invited to take part in the study. Following  
30 online informed consent, the CYP will self-complete an online (or paper) questionnaire about  
31 their mental and physical health. CYP towards the lower end of the 11-18 age band and CYP  
32 with special educational needs or disability may require the help of a carer to complete the  
33 questionnaire.  
34  
35  
36

### 37 *Outcomes*

38  
39 The questionnaires given to CYP include elements of the ISARIC Paediatric COVID-19 follow-  
40 up questionnaire<sup>13</sup> and the recent Mental Health of Children and Young people in England  
41 surveys<sup>14</sup> to facilitate international comparisons regarding the risk factors and profile of Long  
42 COVID in CYP. The questionnaires given to CYP were designed together with the International  
43 Severe Acute Respiratory and emerging Infection Consortium (ISARIC) Paediatric Working  
44 Group to produce a harmonised data collection tool, allowing for standardisation and  
45 metanalysis by design.  
46  
47  
48

49 The elements taken from the ISARIC Paediatric COVID-19 follow-up questionnaire<sup>13</sup> include  
50 questions about demographics and physical symptoms, with particular questions enquiring  
51 about cough and fever, given that these are the main acute symptoms in non-hospitalised  
52 CYP<sup>15</sup> and gastrointestinal symptoms, as a study has shown such symptoms were common in  
53 seropositive CYP<sup>16</sup>. It is likely other symptoms will manifest later in Long COVID (e.g., tiredness,  
54 headaches, myalgia etc.), with the skin rashes and cardiac problems in hospitalised children  
55  
56  
57

1  
2  
3 with Paediatric multisystem inflammatory syndrome being borne in mind for Long COVID<sup>5</sup>.  
4 Those older CYP could very well overlap with adult symptomatology (e.g., a neuropsychiatric-  
5 encephalitic sub-group).  
6

7  
8 In terms of the other questions, the Strengths and Difficulties Questionnaire (SDQ)<sup>17</sup> will be  
9 used to assess emotional and mental health, consisting of 25 items. The EQ-5D-Y<sup>18</sup> will be used  
10 as a measure of quality of life/functioning, with fatigue measured using the 11-item Chalder  
11 Fatigue Questionnaire (CFQ)<sup>19</sup>. Additionally, the short, 7-item version of The Warwick  
12 Edinburgh Mental Wellbeing Scale (WEMWBS)<sup>20</sup> will be included. Loneliness will be measured  
13 using the 4-item UCLA Loneliness Scale for Children<sup>21</sup> as well as self-reported school  
14 attendance.  
15  
16

17  
18 The length of the online self-assessment has an estimated completion time of approximately 20  
19 minutes for CYP. The CYP do not have to complete all of the questions at once but can pause  
20 and save the answers at any point.  
21

### 22 *Statistical analyses*

23  
24  
25 Response rates for positive and negative CYP will inform expectations of final study size and  
26 possibly refinement of the sampling percentages. Descriptive statistics will be used for all  
27 dimensions collected at baseline and the follow-up questionnaires, separately by test status,  
28 wave and month of test. Appropriate data visualisation techniques will be used to examine  
29 trajectories over time for those variables that are measured repeatedly, separately by test status  
30 and month of test. Summary measures of the fatigue and mental health dimensions will be  
31 generated using dimension reduction methods such as latent variables/latent class/PCA  
32 methods. Cross-tabulation of latent variables against test status as well as discriminant analysis  
33 will help operationalise preliminary definitions of Long COVID. These will be compared with  
34 definitions based on categorisation of prolonged symptoms supplemented by a Delphi  
35 consensus process.  
36  
37  
38

### 39 *Sample size*

40  
41  
42 A total of 5,000 participants (2,500 test-positive and 2,500 test-negative) would give 80% power  
43 to detect at least a 4% difference in symptoms at 5% significance, if the COVID-19 negative  
44 participants had a prevalence similar to that reported for adults (i.e., 34%). Greater baseline  
45 prevalences (e.g., 40%) would require slightly greater numbers for the same power and  
46 confidence; smaller baseline prevalences (e.g., 20%) smaller numbers. However, identifying risk  
47 factors for long COVID-19 would require studying demographic, social, family and clinical data  
48 and thus we would require larger numbers. For this reason, we are targeting the recruitment of  
49 6,000 participants.  
50  
51  
52  
53  
54  
55  
56  
57

### *Patient and Public Involvement*

Resources have been allocated for any Patient and Public Involvement (PPI) activities at INVOLVE rates including a nationally representative PPI research advisory group. PPI members will be offered training and support in accordance with the INVOLVE<sup>22</sup> report and other guidance<sup>23</sup> including online training. PPI meetings will take place quarterly.

## **Ethics and Dissemination**

### *Ethical considerations*

PHE has legal permission, provided by Regulation 3 of The Health Service (Control of Patient Information) Regulations 2002, to process patient confidential information for national surveillance of communicable diseases. Individual patient consent is not required for initial invitation to the study. Parents/carers and young people will be sent an invitation with a link to the website with the relevant information sheets and consent forms. They will have the opportunity to ask any questions about the study. Parents/carers of CYP under 16 years of age will be asked to complete a Parent/carer consent form. The young person will also be asked to sign an assent form to indicate their agreement. 16-18-year-olds will be asked for consent (using the Young Person Consent Form); but their parents will not. This is in line with HRA recommended processes<sup>24</sup>.

Study approved by Yorkshire & The Humber - South Yorkshire Research Ethics Committee (REC reference: 21/YH/0060; IRAS project ID:293495).

It is possible that the questionnaires may make some vulnerable participants feel fatigued or distressed from completing questionnaires relating to their mental health and/or report serious symptoms that put them at immediate risk. The research team will provide information on where to seek support and provide self-help information. Unfortunately, the researchers are unable to provide medical advice. However, existing national surveys of children's mental health also follow this risk protocol.

### *Dissemination*

Peer reviewed publications, briefings for policy makers and lay summaries for participants and CYP and carers. Results will be made public, initially on a pre-print server and we will allow reuse of articles under a CC BY licence. The dataset will be made publicly available.

**Author contributions:**

Terence Stephenson [t.stephenson@ucl.ac.uk](mailto:t.stephenson@ucl.ac.uk) conceived the idea for the study, submitted the successful grant application and undertook the first revision of the manuscript.

Roz Shafran [r.shafran@ucl.ac.uk](mailto:r.shafran@ucl.ac.uk) provided ideas on mental health follow up to the original grant application, submitted the ethics and R&D applications and revised the manuscript.

Bianca De Stavola [b.destavola@ucl.ac.uk](mailto:b.destavola@ucl.ac.uk) provided statistical input to the design and analysis, including sample size calculations.

Natalia Rojas [n.rojas@ucl.ac.uk](mailto:n.rojas@ucl.ac.uk) wrote the first draft of the manuscript based on the grant application, protocol and ethics form and compiled the references.

Felicity Aiano [Felicity.Aiano@phe.gov.uk](mailto:Felicity.Aiano@phe.gov.uk) helped develop the study design

Zahin Amin-Chowdhury [Zahin.Amin@phe.gov.uk](mailto:Zahin.Amin@phe.gov.uk) helped develop of the study design

Kelsey McOwat [Kelsey.Mcowat@phe.gov.uk](mailto:Kelsey.Mcowat@phe.gov.uk) adapted the questionnaire for the online SNAP survey platform.

Maria Zavala [Maria.Zavala@phe.gov.uk](mailto:Maria.Zavala@phe.gov.uk) undertook a separate pilot study which informed the CLoCk consent process and the online questionnaire.

Ruth Simmons [Ruth.Simmons@phe.gov.uk](mailto:Ruth.Simmons@phe.gov.uk) designed the participant sampling and dataflow.

Shamez Ladhani [shamez.ladhani@phe.gov.uk](mailto:shamez.ladhani@phe.gov.uk) operationalised the regulatory and recruitment ideas for the study and revised the manuscript.

Olivia Swann and Elizabeth Whittaker designed the elements of the ISARIC Paediatric COVID-19 follow-up questionnaire which were incorporated into the online questionnaire used in this study to which all the CLoCk Consortium members contributed.

All members of the CLoCk Consortium made substantial contributions to the conception or design of the work; were involved in drafting both the funding application and this manuscript; approved the version to be published; and agree to be accountable for all aspects of the work in ensuring that questions related to the accuracy or integrity of any part of the work are appropriately investigated and resolved.

**Co-Applicants on the grant application and CLoCk Consortium members (alphabetical):**

Marta Buszewicz, University College London

Trudie Chalder, King's College London, Chalder, [trudie.chalder@kcl.ac.uk](mailto:trudie.chalder@kcl.ac.uk)

Esther Crawley, University of Bristol, [Esther.Crawley@bristol.ac.uk](mailto:Esther.Crawley@bristol.ac.uk)

Emma Dalrymple, PPI representative, [emmajdalrymple@gmail.com](mailto:emmajdalrymple@gmail.com)

Tamsin Jane Ford, University of Cambridge, [tjf52@medschl.cam.ac.uk](mailto:tjf52@medschl.cam.ac.uk)

Shruti Garg, University of Manchester, [Shruti.Garg@mft.nhs.uk](mailto:Shruti.Garg@mft.nhs.uk)

Anthony Harnden, University of Oxford, [anthony.harnden@phc.ox.ac.uk](mailto:anthony.harnden@phc.ox.ac.uk)

Dougal Hargreaves, Imperial College London, [Dougal.HARGREAVES@education.gov.uk](mailto:Dougal.HARGREAVES@education.gov.uk)

Isobel Heyman, Great Ormond Street Hospital for Children NHS Foundation Trust Heyman, [i.heyman@ucl.ac.uk](mailto:i.heyman@ucl.ac.uk),

Michael Levin, Imperial College London, [m.levin@imperial.ac.uk](mailto:m.levin@imperial.ac.uk)

Vanessa Poustie, University of Liverpool, [v.poustie@liverpool.ac.uk](mailto:v.poustie@liverpool.ac.uk)

Terry Segal, University College London Hospitals NHS Foundation Trust, [terry.segal@nhs.net](mailto:terry.segal@nhs.net)

Malcolm Semple, University of Liverpool, [M.G.Semple@liverpool.ac.uk](mailto:M.G.Semple@liverpool.ac.uk)

1  
2  
3 Kishan Sharma, Manchester University NHS Foundation Trust, [Kishan.Sharma@mft.nhs.uk](mailto:Kishan.Sharma@mft.nhs.uk)  
4 Olivia Swann, University of Edinburgh, [olivia.swann@ed.ac.uk](mailto:olivia.swann@ed.ac.uk)  
5 Elizabeth Whittaker, Imperial College London, [e.whittaker@imperial.ac.uk](mailto:e.whittaker@imperial.ac.uk)  
6  
7

8 **Acknowledgement:** Michael Lattimore, Public Health England, as Project Officer for the CLoCK  
9 study  
10

11 **Competing interests statement:** Terence Stephenson is Chair of the Health Research  
12 Authority and therefore recused himself from the Research Ethics Application  
13  
14

15 **Funding statement:** Funded by The Department of Health and Social Care, in their capacity as  
16 the National Institute for Health Research (NIHR), and by UK Research & Innovation (UKRI)  
17 who have awarded funding grant number COVLT0022. All research at Great Ormond Street  
18 Hospital NHS Foundation Trust and UCL Great Ormond Street Institute of Child Health is made  
19 possible by the NIHR Great Ormond Street Hospital Biomedical Research Centre. The views  
20 expressed are those of the author(s) and not necessarily those of the NHS, the NIHR or the  
21 Department of Health  
22  
23  
24  
25  
26  
27  
28  
29  
30  
31  
32  
33  
34  
35  
36  
37  
38  
39  
40  
41  
42  
43  
44  
45  
46  
47  
48  
49  
50  
51  
52  
53  
54  
55  
56  
57  
58  
59  
60

## References

1. Orben A, Tomova L, Blakemore S-J. The effects of social deprivation on adolescent development and mental health. *The Lancet Child & Adolescent Health* 2020;4(8):634-40. doi: 10.1016/s2352-4642(20)30186-3
2. Whittaker E, Bamford A, Kenny J, et al. Clinical Characteristics of 58 Children With a Pediatric Inflammatory Multisystem Syndrome Temporally Associated With SARS-CoV-2. *JAMA* 2020;324(3):259-69. doi: 10.1001/jama.2020.10369 [published Online First: 2020/06/09]
3. Swann OV, Holden KA, Turtle L, et al. Clinical characteristics of children and young people admitted to hospital with covid-19 in United Kingdom: prospective multicentre observational cohort study. *BMJ* 2020;370:m3249. doi: 10.1136/bmj.m3249 [published Online First: 2020/09/23]
4. Pierce M, Hope H, Ford T, et al. Mental health before and during the COVID-19 pandemic: a longitudinal probability sample survey of the UK population. *The Lancet Psychiatry* 2020;7(10):883-92. doi: 10.1016/s2215-0366(20)30308-4
5. Ludvigsson JF. Case report and systematic review suggest that children may experience similar long-term effects to adults after clinical COVID-19. *Acta Paediatr* 2021;110(3):914-21. doi: 10.1111/apa.15673 [published Online First: 2020/11/19]
6. Sudre CH, Murray B, Varsavsky T, et al. Attributes and predictors of Long-COVID: analysis of COVID cases and their symptoms collected by the Covid Symptoms Study App. 2020 doi: 10.1101/2020.10.19.20214494
7. Moore DA, Nunns M, Shaw L, et al. Interventions to improve the mental health of children and young people with long-term physical conditions: linked evidence syntheses. *Health Technol Assess* 2019;23(22):1-164. doi: 10.3310/hta23220 [published Online First: 2019/05/28]
8. Carroll S, Chalder T, Hemingway C, et al. "It feels like wearing a giant sandbag." Adolescent and parent perceptions of fatigue in paediatric multiple sclerosis. *Eur J Paediatr Neurol* 2016;20(6):938-45. doi: 10.1016/j.ejpn.2016.06.004 [published Online First: 2016/07/17]
9. Carroll S, Chalder T, Hemingway C, et al. Understanding fatigue in paediatric multiple sclerosis: a systematic review of clinical and psychosocial factors. *Dev Med Child Neurol* 2016;58(3):229-39. doi: 10.1111/dmcn.12964 [published Online First: 2015/11/15]
10. Buonsenso D, Espuny Pujol F, Munblit D, et al. Clinical Characteristics, Activity Levels and Mental Health Problems in Children with Long COVID: A Survey of 510 Children. *Preprints* 2021 doi: 10.20944/preprints202103.0271.v1
11. Munblit D, De Rose C, Sinatti D, et al. Preliminary Evidence on Long COVID in children. *medRxiv* 2021
12. S L. Prospective active national surveillance of preschools and primary schools for SARS-CoV-2 infection and transmission in England, June 2020 (sKIDs COVID-19 surveillance in school KIDs). 2020 [Available from: <https://tinyurl.com/sKIDsPhase1Report> accessed 13 April 2021.
13. Sigrid L, Maskell K, Bannister PG, et al. Addressing challenges for clinical research responses to emerging epidemics and pandemics: a scoping review. *BMC Med* 2020;18(1):190. doi: 10.1186/s12916-020-01624-8 [published Online First: 2020/06/27]
14. NHS Digital. Mental Health of Children and Young People in England, 2020: Wave 1 follow up to the 2017 survey 2020 [Available from: <https://tinyurl.com/NHSCYPFU17> accessed 13 April 2021.

15. Ladhani SN, Amin-Chowdhury Z, Davies HG, et al. COVID-19 in children: analysis of the first pandemic peak in England. *Arch Dis Child* 2020;105(12):1180-85. doi: 10.1136/archdischild-2020-320042 [published Online First: 2020/08/17]
16. Waterfield T, Watson C, Moore R, et al. Seroprevalence of SARS-CoV-2 antibodies in children: a prospective multicentre cohort study. *Arch Dis Child* 2020 doi: 10.1136/archdischild-2020-320558 [published Online First: 2020/11/12]
17. Goodman R. Psychometric properties of the strengths and difficulties questionnaire. *J Am Acad Child Adolesc Psychiatry* 2001;40(11):1337-45. doi: 10.1097/00004583-200111000-00015 [published Online First: 2001/11/09]
18. Wille N, Badia X, Bonsel G, et al. Development of the EQ-5D-Y: a child-friendly version of the EQ-5D. *Qual Life Res* 2010;19(6):875-86. doi: 10.1007/s11136-010-9648-y [published Online First: 2010/04/21]
19. Chalder T, Berelowitz G, Pawlikowska T, et al. Development of a fatigue scale. *J Psychosom Res* 1993;37(2):147-53. doi: 10.1016/0022-3999(93)90081-p [published Online First: 1993/01/01]
20. Tennant R, Hiller L, Fishwick R, et al. The Warwick-Edinburgh Mental Well-being Scale (WEMWBS): development and UK validation. *Health Qual Life Outcomes* 2007;5:63. doi: 10.1186/1477-7525-5-63 [published Online First: 2007/11/29]
21. Office of National Statistics. Children's and young people's experiences of loneliness: 2018 [Available from: <https://tinyurl.com/CYPExperiencesOfLoneliness> accessed 13 April 2021.
22. INVOLVE. Developing training and support for public involvement in research 2012 [Available from: <https://www.invo.org.uk/wp-content/uploads/2012/11/INVOLVETrainingSupport2012.pdf> accessed 13 April 2020.
23. National Institute for Health Research (NIHR). PPI (Patient and Public Involvement) resources for applicants to NIHR research programmes. 2019 [Available from: <https://tinyurl.com/PPIApplicantResources> accessed 13 April 2021.
24. Health Research Authority (HRA). Research involving children 2018 [Available from: <https://www.hra.nhs.uk/planning-and-improving-research/policies-standards-legislation/research-involving-children/> accessed 13 April 2021.

1  
2  
3 **Figure 1:** Flowchart of the selection process.  
4  
5  
6  
7  
8  
9  
10  
11  
12  
13  
14  
15  
16  
17  
18  
19  
20  
21  
22  
23  
24  
25  
26  
27  
28  
29  
30  
31  
32  
33  
34  
35  
36  
37  
38  
39  
40  
41  
42  
43  
44  
45  
46  
47  
48  
49  
50  
51  
52  
53  
54  
55  
56  
57  
58  
59  
60

For peer review only



**Figure 1:** Flowchart of the selection process.

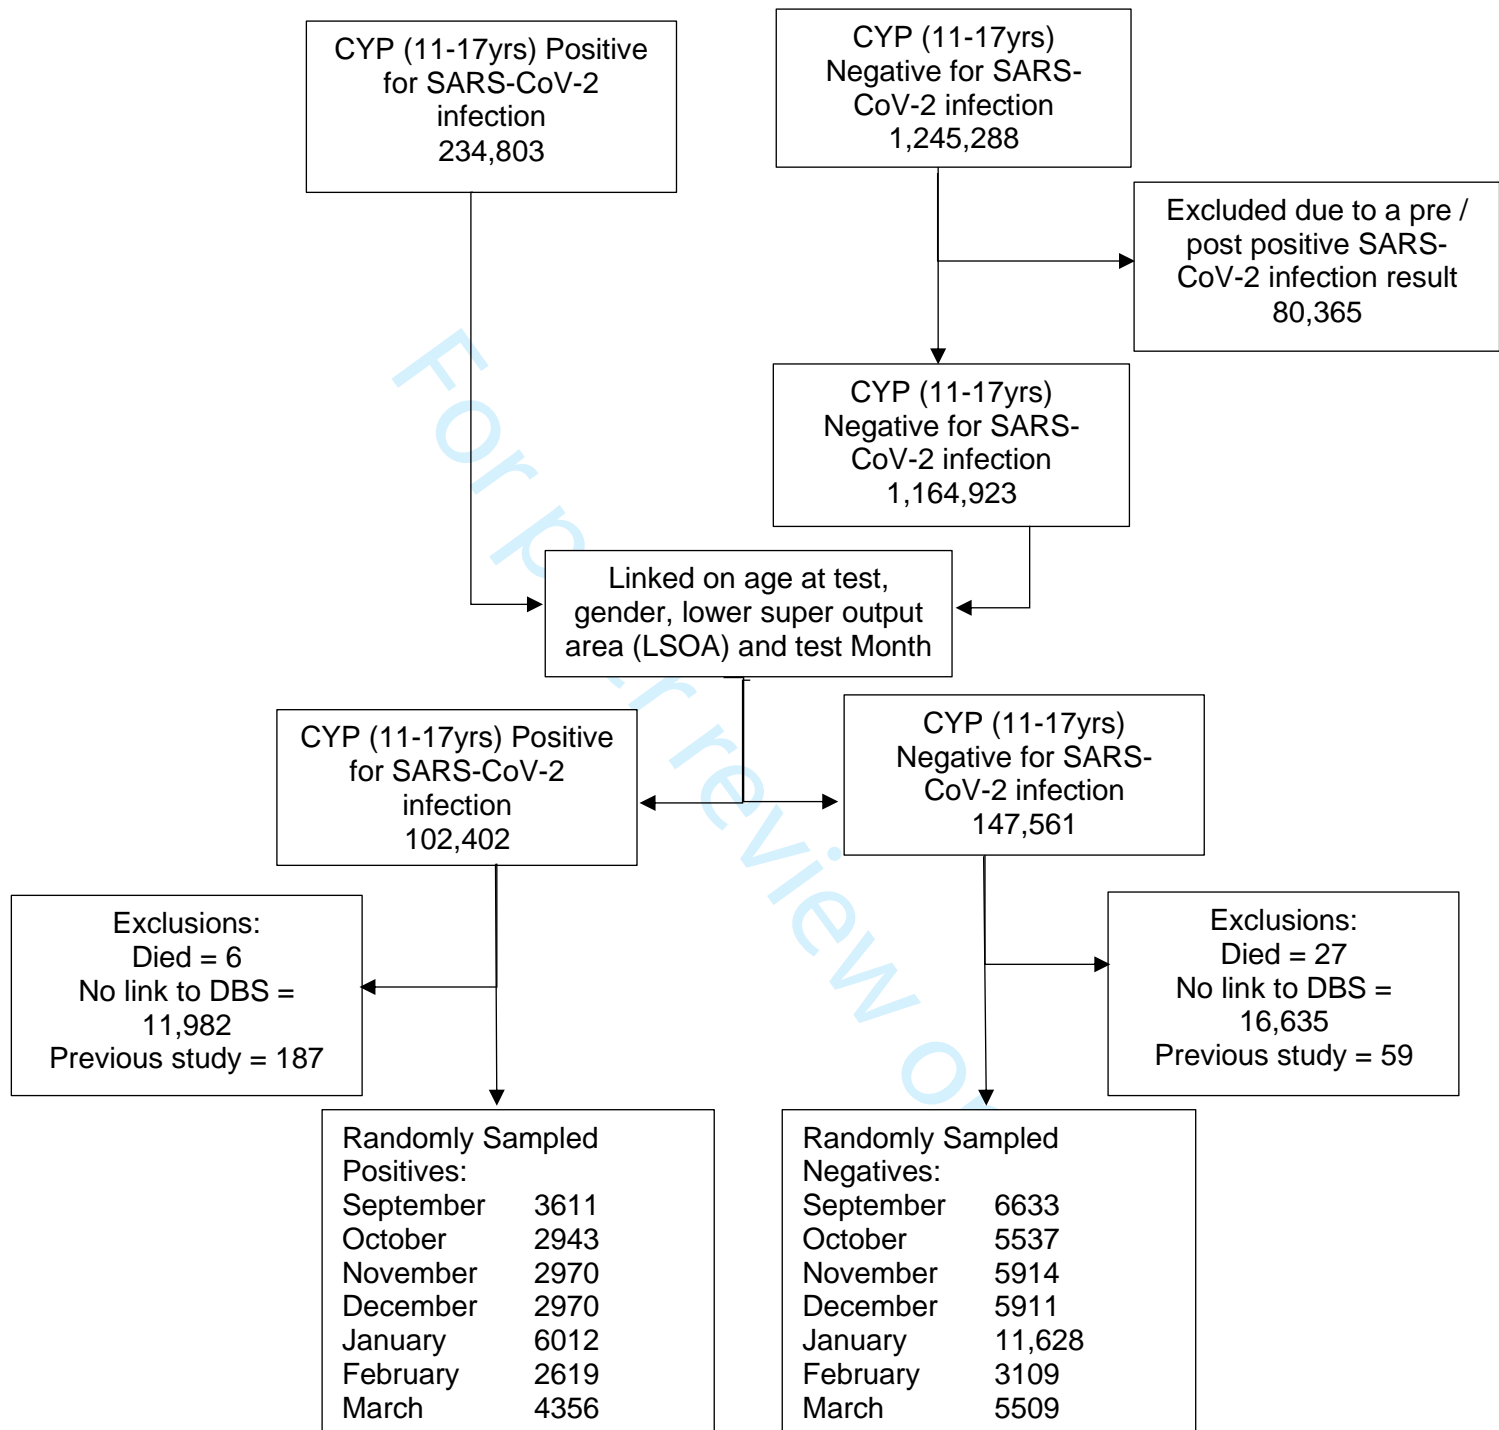

# BMJ Open

## Long Covid and the mental and physical health of children and young people: national matched cohort (CLOCK) study protocol

|                                 |                                                                                                                                                                                                                                                                                                                                                                                                                                                                                                                                                                                                                                                                                                                                                                                             |
|---------------------------------|---------------------------------------------------------------------------------------------------------------------------------------------------------------------------------------------------------------------------------------------------------------------------------------------------------------------------------------------------------------------------------------------------------------------------------------------------------------------------------------------------------------------------------------------------------------------------------------------------------------------------------------------------------------------------------------------------------------------------------------------------------------------------------------------|
| Journal:                        | <i>BMJ Open</i>                                                                                                                                                                                                                                                                                                                                                                                                                                                                                                                                                                                                                                                                                                                                                                             |
| Manuscript ID                   | bmjopen-2021-052838.R1                                                                                                                                                                                                                                                                                                                                                                                                                                                                                                                                                                                                                                                                                                                                                                      |
| Article Type:                   | Protocol                                                                                                                                                                                                                                                                                                                                                                                                                                                                                                                                                                                                                                                                                                                                                                                    |
| Date Submitted by the Author:   | 09-Jul-2021                                                                                                                                                                                                                                                                                                                                                                                                                                                                                                                                                                                                                                                                                                                                                                                 |
| Complete List of Authors:       | Stephenson, Terence; UCL Great Ormond Street Institute of Child Health Population Policy and Practice<br>Shafran, Roz; UCL Great Ormond Street Institute of Child Health Population Policy and Practice<br>De Stavola, Bianca ; UCL Great Ormond Street Institute of Child Health Population Policy and Practice<br>Rojas, Natalia; UCL Great Ormond Street Institute of Child Health Population Policy and Practice<br>Aiano, Felicity; Public Health England<br>Amin-Chowdhury, Zahin; Public Health England<br>McOwat, Kelsey; Public Health England<br>Simmons, Ruth; Public Health England<br>Zavala, Maria; Public Health England<br>CLOCK, Consortium; UCL Great Ormond Street Institute of Child Health Population Policy and Practice<br>Ladhani, Shamez N.; Public Health England |
| <b>Primary Subject Heading</b>: | Paediatrics                                                                                                                                                                                                                                                                                                                                                                                                                                                                                                                                                                                                                                                                                                                                                                                 |
| Secondary Subject Heading:      | Public health, Infectious diseases                                                                                                                                                                                                                                                                                                                                                                                                                                                                                                                                                                                                                                                                                                                                                          |
| Keywords:                       | COVID-19, PAEDIATRICS, INFECTIOUS DISEASES, PUBLIC HEALTH, VIROLOGY                                                                                                                                                                                                                                                                                                                                                                                                                                                                                                                                                                                                                                                                                                                         |
|                                 |                                                                                                                                                                                                                                                                                                                                                                                                                                                                                                                                                                                                                                                                                                                                                                                             |

SCHOLARONE™  
Manuscripts



I, the Submitting Author has the right to grant and does grant on behalf of all authors of the Work (as defined in the below author licence), an exclusive licence and/or a non-exclusive licence for contributions from authors who are: i) UK Crown employees; ii) where BMJ has agreed a CC-BY licence shall apply, and/or iii) in accordance with the terms applicable for US Federal Government officers or employees acting as part of their official duties; on a worldwide, perpetual, irrevocable, royalty-free basis to BMJ Publishing Group Ltd ("BMJ") its licensees and where the relevant Journal is co-owned by BMJ to the co-owners of the Journal, to publish the Work in this journal and any other BMJ products and to exploit all rights, as set out in our [licence](#).

The Submitting Author accepts and understands that any supply made under these terms is made by BMJ to the Submitting Author unless you are acting as an employee on behalf of your employer or a postgraduate student of an affiliated institution which is paying any applicable article publishing charge ("APC") for Open Access articles. Where the Submitting Author wishes to make the Work available on an Open Access basis (and intends to pay the relevant APC), the terms of reuse of such Open Access shall be governed by a Creative Commons licence – details of these licences and which [Creative Commons](#) licence will apply to this Work are set out in our licence referred to above.

Other than as permitted in any relevant BMJ Author's Self Archiving Policies, I confirm this Work has not been accepted for publication elsewhere, is not being considered for publication elsewhere and does not duplicate material already published. I confirm all authors consent to publication of this Work and authorise the granting of this licence.

1  
2  
3 Long Covid and the mental and physical health of children and young people: national  
4 matched cohort (CLoCk) study protocol  
5  
6

7 Abstract 280 words. Main paper 2284 words.  
8

9 Stephenson T<sup>1</sup>, Shafran R<sup>1</sup>, De Stavola B<sup>1</sup>, Rojas N<sup>1</sup>, Aiano F<sup>2</sup>, Amin-Chowdhury Z<sup>2</sup>, McOwat  
10 K<sup>2</sup>, Simmons R<sup>2</sup>, Zavala M<sup>2</sup>, CLoCk Consortium<sup>1</sup>, Ladhani S<sup>2</sup>.  
11  
12

13 1 UCL Great Ormond Street Institute of Child Health

14 2 Public Health England, Colindale  
15

16  
17 **Corresponding author:** Professor Sir Terence Stephenson; UCL Great Ormond Street Institute  
18 of Child Health, 30 Guilford Street, London, WC1N 1EH; Email: [t.stephenson@ucl.ac.uk](mailto:t.stephenson@ucl.ac.uk);  
19 Telephone: 020 7242 9789; Fax Number: N/A  
20

21 **Five Keywords/phrases:** Long COVID, children, young people, cohort study, physical and  
22 mental health  
23  
24  
25  
26  
27  
28  
29  
30  
31  
32  
33  
34  
35  
36  
37  
38  
39  
40  
41  
42  
43  
44  
45  
46  
47  
48  
49  
50  
51  
52  
53  
54  
55  
56  
57  
58  
59  
60

## Abstract

**Introduction:** There is uncertainty surrounding the diagnosis, prevalence, phenotype, duration and treatment of Long COVID. This study aims to (a) describe the clinical phenotype of post-COVID symptomatology in children and young people (CYP) with laboratory-confirmed SARS-CoV-2 infection compared to test-negative controls, (b) produce an operational definition of Long COVID in CYP, and (c) establish its prevalence in CYP.

**Methods and analysis:** A cohort study of SARS-CoV-2 positive CYP aged 11-17 years compared with age-, sex- and geographically-matched SARS-CoV-2 test-negative CYP. CYP aged 11-17 testing positive and negative for SARS-CoV-2 infection will be identified and contacted 3, 6, 12 and 24 months after the test date. Consenting CYP will complete an online questionnaire. We initially planned to recruit 3,000 test positives and 3,000 test negatives but have since extended our target. Data visualisation techniques will be used to examine trajectories over time for symptoms and variables measured repeatedly, separately by original test status. Summary measures of fatigue and mental health dimensions will be generated using dimension reduction methods such as latent variables/latent class/PCA methods. Cross-tabulation of collected and derived variables against test status and discriminant analysis will help operationalise preliminary definitions of Long COVID.

**Ethics and Dissemination:** Research Ethics Committee Approval granted. Data will be stored in secure Public Health England (PHE) servers or University College London's Data Safe Haven. Risks of harm will be minimised by providing information on where to seek support. Results will be published on a pre-print server followed by journal publication, with reuse of articles under a CC BY licence. Data will be published with protection against identification when small frequencies.

**Study registration:** Study registered with ISRCTN: Trial ID: ISRCTN34804192 and granted Urgent Public Health prioritisation.

## Article Summary

### STRENGTHS

- This study does not start with an arbitrary definition of a new condition – ‘opinion-based medicine’
- Rather it represents ‘evidence-based medicine’ - we will seek the views of children and young people on what they have experienced physically and mentally in the months following COVID-19
- The study incorporates a comparator matched cohort of children and young people who have experienced a pandemic, school closure and social isolation but who had a negative COVID test

### WEAKNESSES

- The comparator matched cohort of children and young people must also have had a reason to seek a COVID test: symptoms, anxiety, a contact or a bereavement
- Ideally, we would test all children for antibodies to confirm COVID-19 positive and negative status throughout the study period but we thought would significantly reduce participation

## Introduction

Currently, there is huge uncertainty surrounding the diagnosis, prevalence, phenotype, duration and treatment of Long COVID. There is currently no diagnostic test or code for Long COVID. Consequently, cases of Long COVID are not captured in routine National Health Service (NHS) administrative datasets. Instead, Long COVID may be coded as a variety of different conditions in hospital or symptom clusters in non-hospitalised children and young people (CYP). However, it is possible the symptoms associated with Long COVID are in fact a mixture of factors relating to the pandemic and lockdown as a whole rather than the viral infection itself. For example, factors such as social isolation, anxiety, depression or educational concerns may be the root cause of these symptoms in CYP both with and without SARS-CoV-2 infection. The effects on the developing brain and behaviour of adolescents could be far reaching<sup>1</sup>.

Despite acute COVID-19 illness being milder in CYP, it should not be assumed that those CYP at low risk of life-threatening acute infections<sup>2,3</sup> do not suffer the longer-term consequences of SARS-CoV-2 infection. It is important to study Long COVID within this population given that the psychological and social impact of Long COVID could have major consequences for transition to adulthood. There is a clear need to define the clinical phenotype of Long COVID in order to understand those most at risk, the illness trajectory and to provide accurate information on the natural course of the condition. It is equally important to understand both the physical and mental health impact on CYP with Long COVID, given the rise in mental health problems among CYP since the start of the pandemic<sup>4</sup>. Obtaining a better understanding of which CYP are affected will help with targeting potential interventions.

The greatest risk factor for severe acute SAR-CoV-2 illness has been old age, with other risk factors at all ages including obesity, comorbid long-term conditions, learning and neurological disabilities, mental health problems and ethnic minority status. It is plausible that such CYP may be most at risk of suffering from Long COVID, given that much is still unknown in CYP about the immunological susceptibility and underlying biology of Long COVID. Of all CYP, those likely to be most at risk of Long COVID are teenagers, with existing literature showing they make up the majority of CYP with chronic fatigue, post viral syndromes and persistent symptoms<sup>5</sup>.

In adults, there is emerging evidence that gender is a risk factor for Long COVID, with middle-aged females more susceptible than men<sup>6</sup>. In terms of symptoms, two main groupings have been identified (i) respiratory symptoms (e.g., cough, shortness of breath) as well as fatigue and headaches, and (ii) multi-system, including the brain, gut and heart. Among adults with Long COVID, heart symptoms such as palpitations or fast heartbeat, pins and needles or numbness and problems concentrating ('brain fog') have been reported. Experiencing a greater number of symptoms during the first week of infection, as well as older age, have also been linked to Long COVID. It should be noted mental health conditions were not reported in this cohort. Four syndromes have been described in adults: Post-viral fatigue; Fluctuating multi-system symptoms; Post-intensive care syndrome; and Lasting organ damage. It is known in both adults and young people that a wide range of long-term physical conditions increase the risk of mental ill-health, particularly if the condition involves the central nervous system, with several studies

1  
2  
3 reporting increased rates of all common mental health conditions in children<sup>7</sup>. Moreover, fatigue  
4 has also been studied in paediatric long-term conditions including CYP with multiple sclerosis<sup>8 9</sup>.  
5 Emerging clinical observations and preliminary research indicate that COVID-19 can have a  
6 long-term impact on CYP in a range of domains<sup>10 11</sup> but well conducted, methodologically robust  
7 studies are lacking.  
8  
9

10 This study primarily aims to (a) describe the clinical phenotype and prevalence of post-COVID  
11 symptoms (e.g., pain or physical symptoms, fatigue, sleep problems, mental health problems)  
12 among test positive and test negative CYP, (b) produce an operational definition of Long COVID  
13 in CYP, and (c) establish the prevalence of Long COVID in CYP testing positive for SARS-CoV-  
14 2 infection. The second aim is of particular importance given that this is a prerequisite for any  
15 future epidemiological or interventional study. This will be achieved by using the empirical data  
16 we will acquire from 17,000 CYP and a national Delphi consensus process.  
17  
18  
19

## 20 **Methods**

### 21 *Study design and setting*

22  
23  
24  
25 Public Health England (PHE) has been conducting national surveillance of SARS-CoV-2 since  
26 the start of the pandemic in England. PHE receives daily electronic notifications of all SARS-  
27 CoV-2 RT-PCR tests performed in healthcare settings (Pillar 1 tests) and in the community  
28 (Pillar 2 tests), which are reported through the Second Generation Surveillance System (SGSS).  
29 Information within the SGSS reports includes NHS number, name, age, sex, postcode, date of  
30 sample, reporting laboratory and test result. PHE also has access to the electronic Patient  
31 Demographic Service (PDS), which contains the names, addresses and status (alive/dead) of  
32 all patients registered with the NHS.  
33  
34  
35

36 A sample of CYP aged 11-17 years old when testing positive for SARS-CoV-2 between  
37 September 2020 and March 2021 and COVID test-negative CYP matched for age, sex and  
38 region identified through SGSS will be linked to PDS using available identifiers and postal  
39 addresses. A letter will be posted to them, informing them about the study and inviting them to  
40 take part using an online link. This link will provide them with information about the study, with  
41 an option to consent online and complete a short recruitment questionnaire (or both as paper  
42 options). Recruitment was planned to start in March 2021 and all data collection anticipated to  
43 end in April 2023.  
44  
45  
46

47 This will be a cohort study of SARS-CoV-2 test-positive CYP aged 11-17 years matched on the  
48 test date, age, sex and geography to SARS-CoV-2 test-negative controls identified by PHE.  
49

### 50 *Participants*

51  
52  
53 Between September 2020 and March 2021, 234,803 CYP aged between 11 and 17 years were  
54 diagnosed with COVID-19 in England. During the same period there were 1,481,154 negatives  
55 tests among this age group equivalent to 1,203,996 CYP. Among those who tested negative  
56  
57



1  
2  
3 76,689 individuals (100,154 tests) were excluded as they had a positive result pre and/or post  
4 their negative test. The positive and negative cohorts were linked using age at test, gender, month  
5 of test, and lower super output area resulting in 102,402 positive individuals and 147,561 negative  
6 individuals. Matched individuals were checked against the NHS spine to exclude any individuals  
7 who have died, and to extract participants addresses to send invitation letters. 37 individuals were  
8 excluded because they had died since their COVID-19 test (6 among those positive and 31 among  
9 those negative), and 11,193 individuals of the positive cohort and 19,251 individuals of the  
10 negative cohort were excluded as an address was not available. Finally, 246 CYP were excluded  
11 as they were included in a previous study. Following exclusions 91,016 positive CYP and 128,220  
12 negative CYP will be available to be invited to participate in the study. For all the months except  
13 December, all eligible individuals will be sent an invitation. For those tested in December, 2,970  
14 positive CYP and 5,911 negative CYP will be invited as the eligible number was so large that  
15 additional funding would be needed to invite all those eligible.  
16  
17  
18

19  
20 This is shown schematically in Figure 1.  
21

### 22 *Data collection*

23  
24  
25 Participating families of CYP will be contacted 3, 6, 12 and 24 months after the CYP's SARS-  
26 CoV-2 test (depending on recruitment month) and invited to take part in the study. Following  
27 online informed consent, the CYP will self-complete an online (or paper) questionnaire about  
28 their mental and physical health. CYP towards the lower end of the 11-17 age band and CYP  
29 with special educational needs or disability may require the help of a carer to complete the  
30 questionnaire.  
31  
32

### 33 *Outcomes*

34  
35  
36 The questionnaires given to CYP include elements of the ISARIC Paediatric COVID-19 follow-  
37 up questionnaire<sup>12</sup> and the recent Mental Health of Children and Young people in England  
38 surveys<sup>13</sup> to facilitate international comparisons regarding the risk factors and profile of Long  
39 COVID in CYP. The questionnaires given to CYP were designed together with the International  
40 Severe Acute Respiratory and emerging Infection Consortium (ISARIC) Paediatric Working  
41 Group to produce a harmonised data collection tool, allowing for standardisation and  
42 metanalysis by design.  
43  
44

45  
46 The elements taken from the ISARIC Paediatric COVID-19 follow-up questionnaire<sup>12</sup> include  
47 questions about demographics and physical symptoms, with particular questions enquiring  
48 about cough and fever, given that these are the main acute symptoms in non-hospitalised  
49 CYP<sup>14</sup> and gastrointestinal symptoms, as a study has shown such symptoms were common in  
50 seropositive CYP<sup>15</sup>. It is likely other symptoms will manifest later in Long COVID (e.g., tiredness,  
51 headaches, myalgia etc.), with the skin rashes and cardiac problems in hospitalised children  
52 with paediatric multisystem inflammatory syndrome being borne in mind for Long COVID<sup>5</sup>.  
53 Those older CYP could very well overlap with adult symptomatology (e.g., a neuropsychiatric-  
54 encephalitic sub-group).  
55  
56  
57

1  
2  
3  
4 In terms of the other questions, the Strengths and Difficulties Questionnaire (SDQ)<sup>16</sup> will be  
5 used to assess emotional and mental health, consisting of 25 items. The EQ-5D-Y<sup>17</sup> will be used  
6 as a measure of quality of life/functioning, with fatigue measured using the 11-item Chalder  
7 Fatigue Questionnaire (CFQ)<sup>18</sup>. Additionally, the short, 7-item version of The Warwick  
8 Edinburgh Mental Wellbeing Scale (WEMWBS)<sup>19</sup> will be included. Loneliness will be measured  
9 using the 4-item UCLA Loneliness Scale for Children<sup>20</sup> as well as self-reported school  
10 attendance.  
11  
12

13  
14 The length of the online self-assessment has an estimated completion time of approximately 20  
15 minutes for CYP. The CYP do not have to complete all of the questions at once but can pause  
16 and save the answers at any point.  
17

### 18 *Statistical analyses*

19  
20  
21 Response rates for positive and negative CYP will inform expectations of final study size and  
22 possibly refinement of the sampling percentages. Descriptive statistics will be used for all  
23 dimensions collected at baseline and the follow-up questionnaires, separately by test status,  
24 wave and month of test. Appropriate data visualisation techniques will be used to examine  
25 trajectories over time for those variables that are measured repeatedly, separately by test status  
26 and month of test. Summary measures of the fatigue and mental health dimensions will be  
27 generated using dimension reduction methods such as latent variables/latent class/PCA  
28 methods. Cross-tabulation of latent variables against test status as well as discriminant analysis  
29 will help operationalise preliminary definitions of Long COVID. These will be compared with  
30 definitions based on categorisation of prolonged symptoms supplemented by a Delphi  
31 consensus process.  
32  
33  
34

### 35 *Sample size*

36  
37  
38 A total of 5,000 participants (2,500 test-positive and 2,500 test-negative) would give 80% power  
39 to detect at least a 4% difference in symptoms at 5% significance, if the COVID-19 negative  
40 participants had a prevalence similar to that reported for adults (i.e., 34%). Greater baseline  
41 prevalences (e.g., 40%) would require slightly greater numbers for the same power and  
42 confidence; smaller baseline prevalences (e.g., 20%) smaller numbers. However, identifying risk  
43 factors for long COVID-19 would require studying demographic, social, family and clinical data  
44 and thus we would require larger numbers. For this reason, we are planning to invite all  
45 available participants.  
46  
47  
48

### 49 *Patient and Public Involvement*

50  
51 Resources have been allocated for any Patient and Public Involvement (PPI) activities at  
52 INVOLVE rates including a nationally representative PPI research advisory group. PPI members  
53 will be offered training and support in accordance with the INVOLVE<sup>21</sup> report and other  
54 guidance<sup>22</sup> including online training. PPI meetings will take place quarterly.  
55  
56  
57

## Ethics and Dissemination

### *Ethical considerations*

PHE has legal permission, provided by Regulation 3 of The Health Service (Control of Patient Information) Regulations 2002, to process patient confidential information for national surveillance of communicable diseases. Individual patient consent is not required for initial invitation to the study. Parents/carers and young people will be sent an invitation with a link to the website with the relevant information sheets and consent forms. They will have the opportunity to ask any questions about the study. Parents/carers of CYP under 16 years of age will be asked to complete a Parent/carer consent form. The young person will also be asked to sign an assent form to indicate their agreement. 16-17-year-olds will be asked for consent (using the Young Person Consent Form); but their parents will not. This is in line with Health Research Authority recommended processes<sup>23</sup>.

Study approved by Yorkshire & The Humber - South Yorkshire Research Ethics Committee (REC reference: 21/YH/0060; IRAS project ID:293495).

It is possible that the questionnaires may make some vulnerable participants feel fatigued or distressed from completing questionnaires relating to their mental health and/or report serious symptoms that put them at immediate risk. The research team will provide information on where to seek support and provide self-help information. Unfortunately, the researchers are unable to provide medical advice. However, existing national surveys of children's mental health also follow this risk protocol.

### *Dissemination*

Peer reviewed publications, briefings for policy makers and lay summaries for participants and CYP and carers. Results will be made public, initially on a pre-print server and we will allow reuse of articles under a CC BY licence. The dataset will be made publicly available.

1  
2  
3 **Figure 1:** Flowchart of the selection process.  
4  
5  
6  
7  
8  
9  
10  
11  
12  
13  
14  
15  
16  
17  
18  
19  
20  
21  
22  
23  
24  
25  
26  
27  
28  
29  
30  
31  
32  
33  
34  
35  
36  
37  
38  
39  
40  
41  
42  
43  
44  
45  
46  
47  
48  
49  
50  
51  
52  
53  
54  
55  
56  
57  
58  
59  
60

For peer review only

**Author contributions:**

Terence Stephenson [t.stephenson@ucl.ac.uk](mailto:t.stephenson@ucl.ac.uk) conceived the idea for the study, submitted the successful grant application and undertook the first revision of the manuscript.

Roz Shafran [r.shafran@ucl.ac.uk](mailto:r.shafran@ucl.ac.uk) provided ideas on mental health follow up to the original grant application, submitted the ethics and R&D applications and revised the manuscript.

Bianca De Stavola [b.destavola@ucl.ac.uk](mailto:b.destavola@ucl.ac.uk) provided statistical input to the design and analysis, including sample size calculations.

Natalia Rojas [n.rojas@ucl.ac.uk](mailto:n.rojas@ucl.ac.uk) wrote the first draft of the manuscript based on the grant application, protocol and ethics form and compiled the references.

Felicity Aiano [Felicity.Aiano@phe.gov.uk](mailto:Felicity.Aiano@phe.gov.uk) helped develop the study design

Zahin Amin-Chowdhury [Zahin.Amin@phe.gov.uk](mailto:Zahin.Amin@phe.gov.uk) helped develop the study design

Kelsey McOwat [Kelsey.Mcowat@phe.gov.uk](mailto:Kelsey.Mcowat@phe.gov.uk) adapted the questionnaire for the online SNAP survey platform.

Maria Zavala [Maria.Zavala@phe.gov.uk](mailto:Maria.Zavala@phe.gov.uk) undertook a separate pilot study which informed the CLoCk consent process and the online questionnaire.

Ruth Simmons [Ruth.Simmons@phe.gov.uk](mailto:Ruth.Simmons@phe.gov.uk) designed the participant sampling and dataflow.

Shamez Ladhani [shamez.ladhani@phe.gov.uk](mailto:shamez.ladhani@phe.gov.uk) operationalised the regulatory and recruitment ideas for the study and revised the manuscript.

Olivia Swann and Elizabeth Whittaker designed the elements of the ISARIC Paediatric COVID-19 follow-up questionnaire which were incorporated into the online questionnaire used in this study to which all the CLoCk Consortium members contributed.

All members of the CLoCk Consortium made substantial contributions to the conception or design of the work; were involved in drafting both the funding application and this manuscript; approved the version to be published; and agree to be accountable for all aspects of the work in ensuring that questions related to the accuracy or integrity of any part of the work are appropriately investigated and resolved.

**Co-Applicants on the grant application and CLoCk Consortium members (alphabetical):**

Marta Buszewicz, University College London

Trudie Chalder, King's College London, [trudie.chalder@kcl.ac.uk](mailto:trudie.chalder@kcl.ac.uk)

Esther Crawley, University of Bristol, [Esther.Crawley@bristol.ac.uk](mailto:Esther.Crawley@bristol.ac.uk)

Emma Dalrymple, PPI representative, [emmajdalrymple@gmail.com](mailto:emmajdalrymple@gmail.com)

Tamsin Jane Ford, University of Cambridge, [tjf52@medschl.cam.ac.uk](mailto:tjf52@medschl.cam.ac.uk)

Shruti Garg, University of Manchester, [Shruti.Garg@mft.nhs.uk](mailto:Shruti.Garg@mft.nhs.uk)

Anthony Harnden, University of Oxford, [anthony.harnden@phc.ox.ac.uk](mailto:anthony.harnden@phc.ox.ac.uk)

Dougal Hargreaves, Imperial College London, [Dougal.HARGREAVES@education.gov.uk](mailto:Dougal.HARGREAVES@education.gov.uk)

Isobel Heyman, Great Ormond Street Hospital for Children NHS Foundation Trust, [i.heyman@ucl.ac.uk](mailto:i.heyman@ucl.ac.uk),

Michael Levin, Imperial College London, [m.levin@imperial.ac.uk](mailto:m.levin@imperial.ac.uk)

Vanessa Poustie, University of Liverpool, [v.poustie@liverpool.ac.uk](mailto:v.poustie@liverpool.ac.uk)

Terry Segal, University College London Hospitals NHS Foundation Trust, [terry.segal@nhs.net](mailto:terry.segal@nhs.net)

Malcolm Semple, University of Liverpool, [M.G.Semple@liverpool.ac.uk](mailto:M.G.Semple@liverpool.ac.uk)

1  
2  
3 Kishan Sharma, Manchester University NHS Foundation Trust, [Kishan.Sharma@mft.nhs.uk](mailto:Kishan.Sharma@mft.nhs.uk)  
4 Olivia Swann, University of Edinburgh, [olivia.swann@ed.ac.uk](mailto:olivia.swann@ed.ac.uk)  
5 Elizabeth Whittaker, Imperial College London, [e.whittaker@imperial.ac.uk](mailto:e.whittaker@imperial.ac.uk)  
6  
7

8 **Acknowledgement:** Michael Lattimore, Public Health England, as Project Officer for the CLoCK  
9 study  
10

11 **Competing interests statement:** Terence Stephenson is Chair of the Health Research  
12 Authority and therefore recused himself from the Research Ethics Application  
13  
14

15 **Funding statement:** Funded by The Department of Health and Social Care, in their capacity as  
16 the National Institute for Health Research (NIHR), and by UK Research & Innovation (UKRI)  
17 who have awarded funding grant number COVLT0022. All research at Great Ormond Street  
18 Hospital NHS Foundation Trust and UCL Great Ormond Street Institute of Child Health is made  
19 possible by the NIHR Great Ormond Street Hospital Biomedical Research Centre. The views  
20 expressed are those of the author(s) and not necessarily those of the NHS, the NIHR or the  
21 Department of Health  
22  
23

24  
25 **Data Sharing:** Applications for relevant anonymised data should be submitted to the PHE office  
26 for Data Release: [https://www.gov.uk/government/publications/accessing-public-health-england-](https://www.gov.uk/government/publications/accessing-public-health-england-data/about-the-phe-odr-and-accessing-data)  
27 [data/about-the-phe-odr-and-accessing-data](https://www.gov.uk/government/publications/accessing-public-health-england-data/about-the-phe-odr-and-accessing-data)  
28  
29  
30  
31  
32  
33  
34  
35  
36  
37  
38  
39  
40  
41  
42  
43  
44  
45  
46  
47  
48  
49  
50  
51  
52  
53  
54  
55  
56  
57  
58  
59  
60

## References

1. Orben A, Tomova L, Blakemore S-J. The effects of social deprivation on adolescent development and mental health. *The Lancet Child & Adolescent Health* 2020;4(8):634-40. doi: 10.1016/s2352-4642(20)30186-3
2. Whittaker E, Bamford A, Kenny J, et al. Clinical Characteristics of 58 Children With a Pediatric Inflammatory Multisystem Syndrome Temporally Associated With SARS-CoV-2. *JAMA* 2020;324(3):259-69. doi: 10.1001/jama.2020.10369 [published Online First: 2020/06/09]
3. Swann OV, Holden KA, Turtle L, et al. Clinical characteristics of children and young people admitted to hospital with covid-19 in United Kingdom: prospective multicentre observational cohort study. *BMJ* 2020;370:m3249. doi: 10.1136/bmj.m3249 [published Online First: 2020/09/23]
4. Pierce M, Hope H, Ford T, et al. Mental health before and during the COVID-19 pandemic: a longitudinal probability sample survey of the UK population. *The Lancet Psychiatry* 2020;7(10):883-92. doi: 10.1016/s2215-0366(20)30308-4
5. Ludvigsson JF. Case report and systematic review suggest that children may experience similar long-term effects to adults after clinical COVID-19. *Acta Paediatr* 2021;110(3):914-21. doi: 10.1111/apa.15673 [published Online First: 2020/11/19]
6. Sudre CH, Murray B, Varsavsky T, et al. Attributes and predictors of Long-COVID: analysis of COVID cases and their symptoms collected by the Covid Symptoms Study App. 2020 doi: 10.1101/2020.10.19.20214494
7. Moore DA, Nunns M, Shaw L, et al. Interventions to improve the mental health of children and young people with long-term physical conditions: linked evidence syntheses. *Health Technol Assess* 2019;23(22):1-164. doi: 10.3310/hta23220 [published Online First: 2019/05/28]
8. Carroll S, Chalder T, Hemingway C, et al. "It feels like wearing a giant sandbag." Adolescent and parent perceptions of fatigue in paediatric multiple sclerosis. *Eur J Paediatr Neurol* 2016;20(6):938-45. doi: 10.1016/j.ejpn.2016.06.004 [published Online First: 2016/07/17]
9. Carroll S, Chalder T, Hemingway C, et al. Understanding fatigue in paediatric multiple sclerosis: a systematic review of clinical and psychosocial factors. *Dev Med Child Neurol* 2016;58(3):229-39. doi: 10.1111/dmcn.12964 [published Online First: 2015/11/15]
10. Buonsenso D, Espuny Pujol F, Munblit D, et al. Clinical Characteristics, Activity Levels and Mental Health Problems in Children with Long COVID: A Survey of 510 Children. *Preprints* 2021 doi: 10.20944/preprints202103.0271.v1
11. Munblit D, De Rose C, Sinatti D, et al. Preliminary Evidence on Long COVID in children. *medRxiv* 2021
12. Sigfrid L, Maskell K, Bannister PG, et al. Addressing challenges for clinical research responses to emerging epidemics and pandemics: a scoping review. *BMC Med* 2020;18(1):190. doi: 10.1186/s12916-020-01624-8 [published Online First: 2020/06/27]
13. NHS Digital. Mental Health of Children and Young People in England, 2020: Wave 1 follow up to the 2017 survey 2020 [Available from: <https://tinyurl.com/NHSCYPFU17> accessed 13 April 2021].
14. Ladhani SN, Amin-Chowdhury Z, Davies HG, et al. COVID-19 in children: analysis of the first pandemic peak in England. *Arch Dis Child* 2020;105(12):1180-85. doi: 10.1136/archdischild-2020-320042 [published Online First: 2020/08/17]
15. Waterfield T, Watson C, Moore R, et al. Seroprevalence of SARS-CoV-2 antibodies in children: a prospective multicentre cohort study. *Arch Dis Child* 2020 doi: 10.1136/archdischild-2020-320558 [published Online First: 2020/11/12]

16. Goodman R. Psychometric properties of the strengths and difficulties questionnaire. *J Am Acad Child Adolesc Psychiatry* 2001;40(11):1337-45. doi: 10.1097/00004583-200111000-00015 [published Online First: 2001/11/09]
17. Wille N, Badia X, Bonsel G, et al. Development of the EQ-5D-Y: a child-friendly version of the EQ-5D. *Qual Life Res* 2010;19(6):875-86. doi: 10.1007/s11136-010-9648-y [published Online First: 2010/04/21]
18. Chalder T, Berelowitz G, Pawlikowska T, et al. Development of a fatigue scale. *J Psychosom Res* 1993;37(2):147-53. doi: 10.1016/0022-3999(93)90081-p [published Online First: 1993/01/01]
19. Tennant R, Hiller L, Fishwick R, et al. The Warwick-Edinburgh Mental Well-being Scale (WEMWBS): development and UK validation. *Health Qual Life Outcomes* 2007;5:63. doi: 10.1186/1477-7525-5-63 [published Online First: 2007/11/29]
20. Office of National Statistics. Children's and young people's experiences of loneliness: 2018 [Available from: <https://tinyurl.com/CYPExperiencesOfLoneliness> accessed 13 April 2021.
21. INVOLVE. Developing training and support for public involvement in research 2012 [Available from: <https://www.invo.org.uk/wp-content/uploads/2012/11/INVOLVETrainingSupport2012.pdf> accessed 13 April 2020.
22. National Institute for Health Research (NIHR). PPI (Patient and Public Involvement) resources for applicants to NIHR research programmes. 2019 [Available from: <https://tinyurl.com/PPIApplicantResources> accessed 13 April 2021.
23. Health Research Authority (HRA). Research involving children 2018 [Available from: <https://www.hra.nhs.uk/planning-and-improving-research/policies-standards-legislation/research-involving-children/> accessed 13 April 2021.



**Figure 1:** Flowchart of the selection process.

1  
2  
3  
4  
5  
6  
7  
8  
9  
10  
11  
12  
13  
14  
15  
16  
17  
18  
19  
20  
21  
22  
23  
24  
25  
26  
27  
28  
29  
30  
31  
32  
33  
34  
35  
36  
37  
38  
39  
40  
41  
42  
43  
44  
45  
46  
47  
48  
49  
50  
51  
52  
53  
54  
55  
56  
57  
58  
59  
60

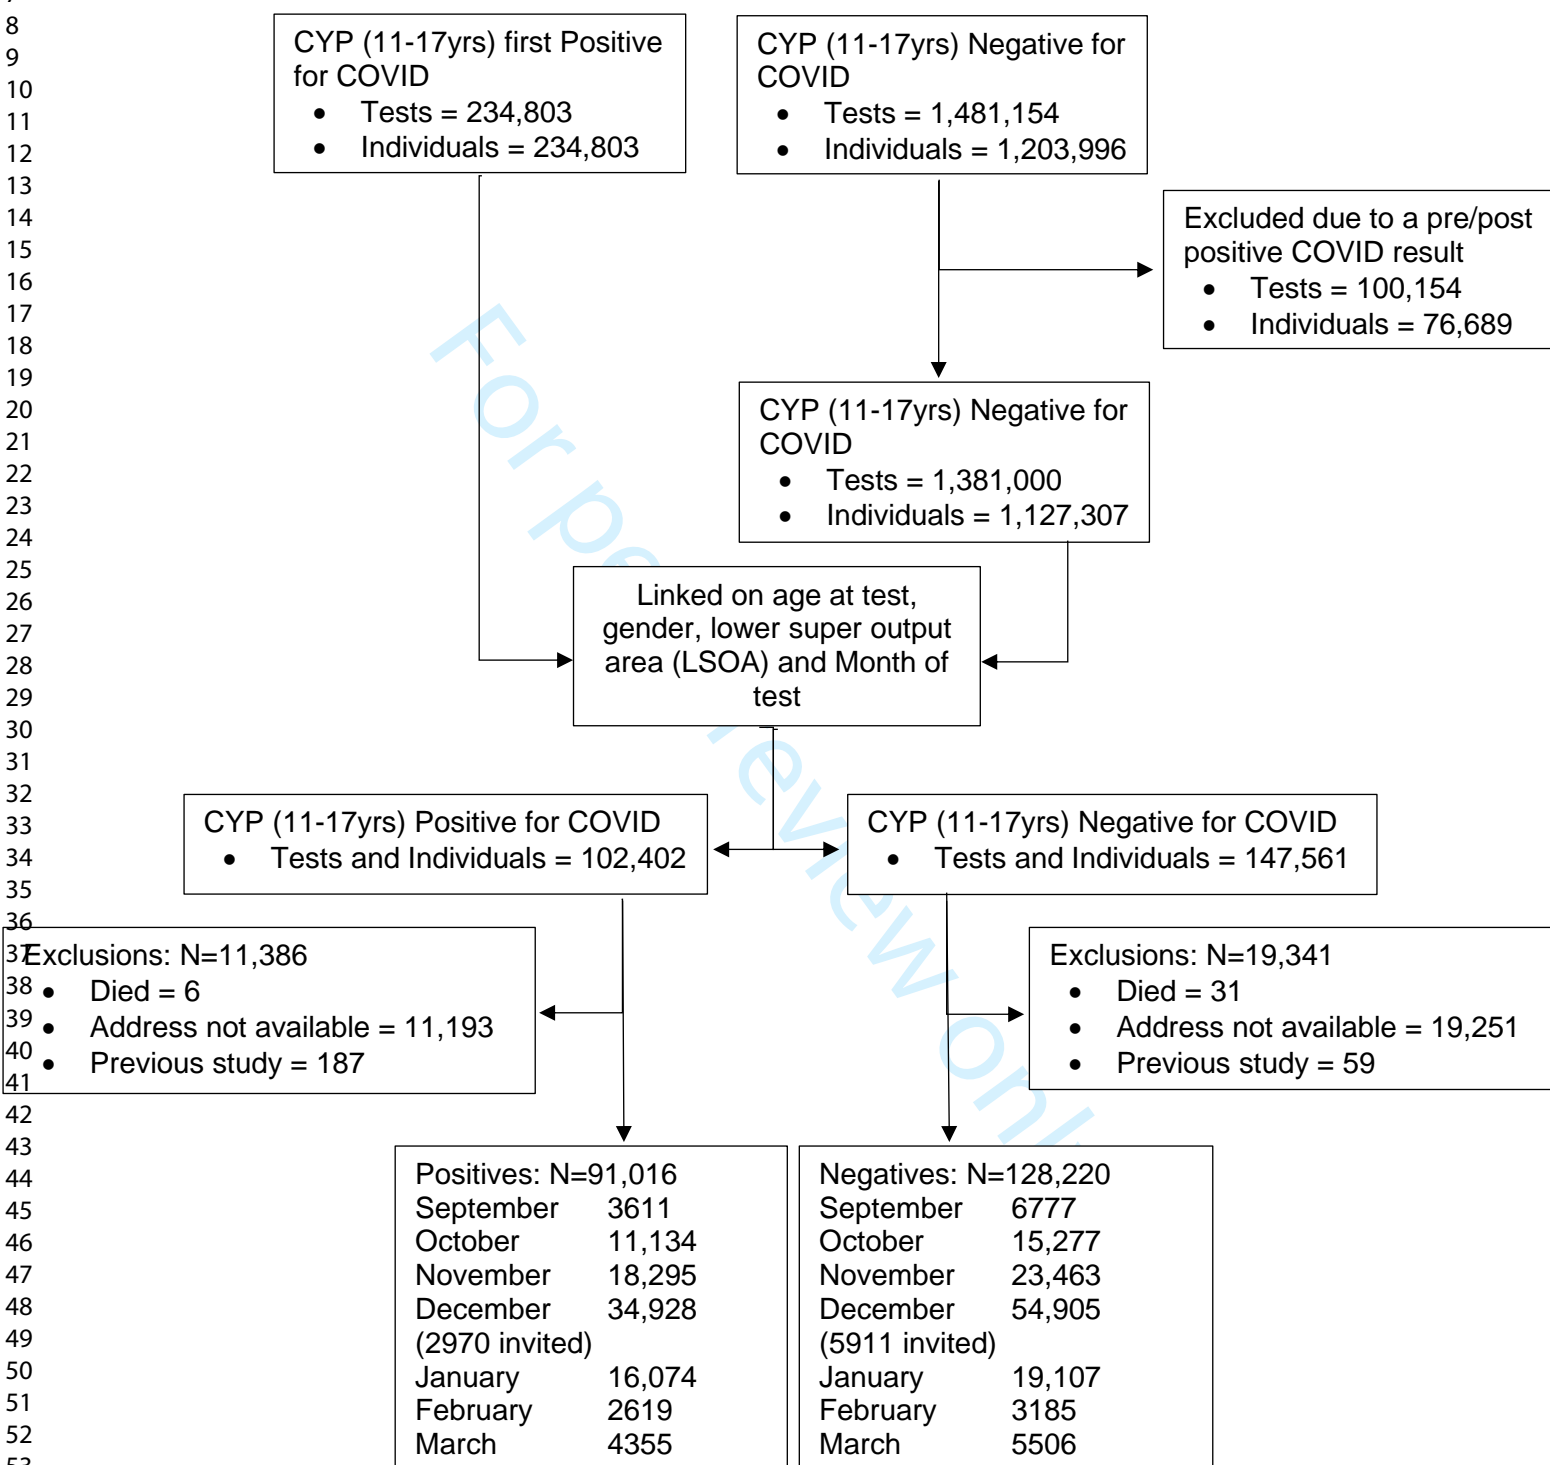

Supplement: bmjopen-2021-052838.draft_revisions.pdf [file bmjopen-2021-052838.draft_revisions.pdf]
